# Supplementary material for: Microbial strain-level population structure and genetic diversity from metagenomes
Source: Genome Res. 2017 Apr;27(4):626–38. doi: 10.1101/gr.216242.116 (PMC5378180; doi:10.1101/gr.216242.116)
Supplement: Supplemental Material [file supp_gr.216242.116_Supplemental_Table_S8.xlsx]

## Sheet: Supplemental Table S8
Species	number_of_samples	number_of_genomes	alignment_length	distribution_of_absolute_distances (max, min, median, average, percentile_75, percentile_25)	distribution_of_relative_distances	distribution_of_relative_abundances
Akkermansia muciniphila	255	2	108877	[2179, 0, 1062, 1068.45, 1351, 820]	[0.020013, 0, 0.009754, 0.00981339, 0.012408, 0.007531]	[29.0106, 0.27294, 3.10558, 4.89757, 6.78369, 1.4629]
Alloscardovia omnicolens	2	2	97791	[654, 654, 654, 654, 654, 654]	[0.006688, 0.006688, 0.006688, 0.006688, 0.006688, 0.006688]	[1.37903, 0.85581, 1.11742, 1.11742, 1.24822, 0.986615]
Bacteroidales bacterium ph8	147	1	66794	[531, 5, 379, 354.188, 429, 316]	[0.00795, 7.5e-05, 0.005674, 0.00530271, 0.006423, 0.004731]	[16.7827, 0.23116, 1.11017, 1.64574, 1.8537, 0.708485]
Barnesiella intestinihominis	394	1	119393	[1762, 0, 1222, 1158.57, 1324, 1084]	[0.014758, 0, 0.010235, 0.0097038, 0.011089, 0.009079]	[19.2359, 0.28869, 2.31022, 3.24269, 4.25099, 1.32154]
Catenibacterium mitsuokai	30	1	14194	[314, 10, 163, 169.379, 194.75, 140]	[0.022122, 0.000705, 0.011484, 0.0119332, 0.0137205, 0.009863]	[35.9092, 0.31739, 2.7096, 4.95654, 5.73904, 1.41319]
Faecalibacterium prausnitzii	820	3	97493	[7712, 0, 3434, 3536.59, 4091, 2867]	[0.079103, 0, 0.035223, 0.0362753, 0.041962, 0.029407]	[47.4365, 0.30159, 5.43229, 7.08937, 8.73811, 3.23166]
Finegoldia magna	1	6	64388	[0, 0, 0, 0, 0, 0]	[0, 0, 0, 0, 0, 0]	[0.15383, 0.15383, 0.15383, 0.15383, 0.15383, 0.15383]
Methanosphaera stadtmanae	8	1	49473	[89, 48, 71, 69.1786, 76, 65]	[0.001799, 0.00097, 0.001435, 0.00139825, 0.001536, 0.001314]	[1.85912, 0.50549, 1.01457, 1.15409, 1.59384, 0.805633]
Phascolarctobacterium succinatutens	148	2	73966	[3985, 21, 2883, 2517.07, 3339, 2333.5]	[0.053876, 0.000284, 0.038977, 0.0340301, 0.045142, 0.0315485]	[23.3914, 0.29252, 2.98715, 3.93724, 5.26043, 1.73311]
Acidaminococcus fermentans	11	1	22698	[143, 3, 88, 91.0545, 98, 75.5]	[0.0063, 0.000132, 0.003877, 0.00401153, 0.004318, 0.003326]	[9.79019, 0.67116, 1.79121, 2.36522, 2.24376, 1.09943]
Acidaminococcus sp D21	18	1	724	[1, 0, 0, 0.294118, 1, 0]	[0.001381, 0, 0, 0.000406176, 0.001381, 0]	[16.502, 0.11678, 0.697645, 2.79325, 1.52037, 0.190745]
Alistipes indistinctus	56	1	82485	[2049, 2, 422, 445.239, 463, 375]	[0.024841, 2.4e-05, 0.005116, 0.00539783, 0.005613, 0.004546]	[6.09337, 0.23279, 1.04014, 1.48689, 1.70613, 0.73816]
Alistipes onderdonkii	47	1	35976	[349, 1, 208, 199.413, 228, 183]	[0.009701, 2.8e-05, 0.005782, 0.00554297, 0.006338, 0.005087]	[15.2517, 0.3021, 1.85046, 3.29445, 4.10177, 0.956245]
Alistipes putredinis	661	1	41975	[675, 0, 242, 239.656, 302, 177]	[0.016081, 0, 0.005765, 0.0057095, 0.007195, 0.004217]	[42.4718, 0.29669, 3.69472, 4.91338, 6.62855, 1.9976]
Alistipes shahii	285	1	60687	[523, 23, 297, 297.456, 330, 267]	[0.008618, 0.000379, 0.004894, 0.00490148, 0.005438, 0.0044]	[17.2648, 0.28817, 1.3457, 1.9169, 2.26715, 0.86312]
Alistipes sp HGB5	60	1	9320	[139, 0, 39, 47.3017, 51, 26]	[0.014914, 0, 0.004185, 0.0050753, 0.005472, 0.00279]	[13.0301, 0.24462, 1.09119, 2.51678, 2.22187, 0.69273]
Bacteroides caccae	514	2	141778	[882, 1, 518, 513.632, 617, 426]	[0.006221, 7e-06, 0.003654, 0.00362279, 0.004352, 0.003005]	[53.0077, 0.31262, 1.98081, 3.38911, 3.74259, 1.03089]
Bacteroides cellulosilyticus	267	2	78267	[842, 0, 520, 500.792, 571, 468]	[0.010758, 0, 0.006644, 0.0063985, 0.007296, 0.00598]	[35.5823, 0.19161, 2.10921, 4.2055, 4.86995, 1.10482]
Bacteroides coprocola	193	1	27970	[320, 0, 204, 185.357, 231, 169]	[0.011441, 0, 0.007294, 0.006627, 0.008259, 0.006042]	[31.3619, 0.39433, 3.93215, 6.75317, 8.88453, 1.68578]
Bacteroides coprophilus	77	1	13956	[144, 0, 105, 97.9984, 114, 86]	[0.010318, 0, 0.007524, 0.00702195, 0.008169, 0.006162]	[26.9227, 0.28288, 3.69396, 4.9121, 6.32078, 1.79665]
Bacteroides dorei	494	7	88361	[842, 0, 201, 202.944, 230, 175]	[0.009529, 0, 0.002275, 0.00229676, 0.002603, 0.001981]	[49.7174, 0.00185, 1.83473, 4.61552, 4.94514, 0.70234]
Bacteroides eggerthii	170	2	84062	[585, 0, 393, 364.181, 435, 340]	[0.006959, 0, 0.004675, 0.00433229, 0.005175, 0.004045]	[67.4315, 0.34142, 4.30858, 7.20226, 9.35311, 1.66873]
Bacteroides faecis	103	1	30380	[127, 0, 67, 56.3332, 79, 33]	[0.00418, 0, 0.002205, 0.00185426, 0.0026, 0.001086]	[39.2284, 0.23635, 1.78298, 3.13493, 3.05961, 0.967765]
Bacteroides finegoldii	124	3	79523	[1369, 1, 466, 557.502, 670, 325]	[0.017215, 1.3e-05, 0.00586, 0.00701057, 0.008425, 0.004087]	[43.9404, 0.20988, 1.69331, 4.00205, 4.07022, 0.961775]
Bacteroides fragilis	278	52	84200	[675, 0, 412, 409.178, 451, 378]	[0.008017, 0, 0.004893, 0.00485959, 0.005356, 0.004489]	[39.7402, 0.16382, 1.97152, 3.60468, 3.88854, 1.05773]
Bacteroides intestinalis	74	1	28244	[185, 0, 109, 104.813, 129, 85]	[0.00655, 0, 0.003859, 0.00371099, 0.004567, 0.003009]	[17.7439, 0.32715, 2.66934, 3.38646, 4.4716, 1.03964]
Bacteroides massiliensis	344	3	78468	[504, 0, 299, 306.765, 392, 261]	[0.006423, 0, 0.00381, 0.00390943, 0.004996, 0.003326]	[32.1684, 0.24377, 3.92562, 6.18205, 7.81795, 1.82116]
Bacteroides ovatus	412	6	80945	[1033, 0, 369, 347.516, 416, 305]	[0.012762, 0, 0.004559, 0.00429324, 0.005139, 0.003768]	[71.1265, 0.16892, 1.91375, 5.60672, 5.43271, 0.970753]
Bacteroides pectinophilus	28	1	13574	[130, 41, 72, 78.4603, 84, 65.25]	[0.009577, 0.00302, 0.005304, 0.00578028, 0.006188, 0.00480725]	[12.9369, 0.45339, 1.74283, 3.22621, 3.57072, 1.3461]
Bacteroides salyersiae	93	3	109680	[579, 1, 371, 306.961, 415, 199]	[0.005279, 9e-06, 0.003383, 0.00279869, 0.003784, 0.001814]	[8.92304, 0.33337, 1.62022, 2.1068, 2.86296, 0.81264]
Bacteroides sp 1 1 6	16	1	48511	[95, 0, 15, 33.75, 56.25, 7]	[0.001958, 0, 0.000309, 0.000695717, 0.00115925, 0.000144]	[10.9503, 0.65365, 2.19242, 3.23411, 3.72577, 1.95188]
Bacteroides sp 3 1 19	15	1	42823	[138, 0, 47, 54.9231, 81.5, 29.5]	[0.003223, 0, 0.001098, 0.00128256, 0.0019035, 0.000689]	[8.88299, 0.49267, 2.64797, 3.44354, 4.42314, 1.75579]
Bacteroides stercoris	415	2	87766	[1405, 1, 846, 830.673, 980, 731]	[0.016008, 1.1e-05, 0.009639, 0.00946464, 0.011166, 0.008329]	[67.882, 0.34418, 4.55391, 7.70069, 10.2717, 1.93595]
Bacteroides thetaiotaomicron	431	2	113883	[1658, 1, 802, 782.114, 931, 652]	[0.014559, 9e-06, 0.007042, 0.0068677, 0.008175, 0.005725]	[36.5872, 0.0013, 1.21524, 2.50367, 2.82841, 0.58136]
Bacteroides uniformis	958	5	77362	[1169, 0, 482, 486.837, 567, 407]	[0.015111, 0, 0.00623, 0.00629298, 0.007329, 0.005261]	[46.5634, 0.00064, 2.67346, 5.04161, 6.36186, 0.92645]
Bacteroides vulgatus	826	7	52826	[342, 0, 148, 147.28, 169, 125]	[0.006474, 0, 0.002802, 0.00278801, 0.003199, 0.002366]	[53.5782, 0.00107, 2.55293, 4.54924, 5.29316, 1.03645]
Bifidobacterium adolescentis	222	5	103340	[678, 50, 455, 457.959, 494, 420]	[0.006561, 0.000484, 0.004403, 0.00443157, 0.00478, 0.004064]	[41.6651, 0.1621, 2.1799, 3.86038, 4.17304, 1.18053]
Bifidobacterium animalis	14	17	27896	[13, 0, 5, 4.85714, 7, 3]	[0.000466, 0, 0.000179, 0.000174198, 0.000251, 0.000108]	[6.88512, 0.60443, 1.26354, 2.06729, 1.84679, 1.05907]
Bifidobacterium bifidum	92	8	69997	[615, 33, 453, 447.343, 490, 412]	[0.008786, 0.000471, 0.006472, 0.0063909, 0.007, 0.005886]	[15.426, 0.40158, 1.48864, 2.27077, 2.74631, 0.975927]
Bifidobacterium breve	11	17	30955	[273, 131, 174, 192.873, 235.5, 158]	[0.008819, 0.004232, 0.005621, 0.00623071, 0.007608, 0.005104]	[47.4481, 0.24867, 3.41824, 12.0719, 13.0736, 1.32346]
Bifidobacterium dentium	19	5	15173	[201, 6, 134, 124.52, 158, 104]	[0.013247, 0.000395, 0.008831, 0.0082067, 0.010413, 0.006854]	[8.39166, 0.4095, 0.73687, 1.2946, 1.07089, 0.55395]
Bifidobacterium longum	256	24	101996	[721, 8, 465, 465.805, 511, 419]	[0.007069, 7.8e-05, 0.004559, 0.0045669, 0.00501, 0.004108]	[36.9901, 0.40049, 2.07707, 2.98801, 3.49479, 1.10832]
Bifidobacterium pseudocatenulatum	84	4	15549	[166, 1, 65, 68.2765, 74, 57]	[0.010676, 6.4e-05, 0.00418, 0.00439107, 0.004759, 0.003666]	[25.167, 0.22089, 1.92266, 3.63083, 4.59287, 1.04988]
Blautia hydrogenotrophica	15	1	27788	[70, 1, 54.5, 42.8333, 61, 12.25]	[0.002519, 3.6e-05, 0.001961, 0.0015413, 0.002195, 0.000441]	[2.36052, 0.52415, 1.27799, 1.38425, 1.90847, 0.840555]
Butyrivibrio crossotus	148	1	38706	[512, 0, 252, 291.245, 387, 213]	[0.013228, 0, 0.006511, 0.00752456, 0.009998, 0.005503]	[55.1638, 0.56021, 11.0259, 14.2087, 19.3275, 3.85288]
Citrobacter freundii	5	12	10398	[132, 49, 79.5, 86.6, 103.25, 74.5]	[0.012695, 0.004712, 0.0076455, 0.0083285, 0.0099295, 0.007165]	[3.9516, 0.61024, 0.79903, 1.37933, 0.86454, 0.67123]
Clostridium bolteae	62	4	50976	[777, 1, 402.5, 431.424, 624, 253]	[0.015242, 2e-05, 0.007896, 0.00846328, 0.012241, 0.004963]	[55.1779, 0.06144, 1.27128, 3.62466, 2.67728, 0.64932]
Clostridium clostridioforme	21	5	9804	[104, 0, 24, 46.7647, 89, 12]	[0.010608, 0, 0.002448, 0.00477, 0.009078, 0.001224]	[22.3669, 0.3146, 1.03534, 4.15618, 5.72129, 0.81147]
Clostridium hathewayi	10	3	37019	[675, 1, 374, 401.756, 612, 251]	[0.018234, 2.7e-05, 0.010103, 0.0108527, 0.016532, 0.00678]	[10.3534, 0.33372, 1.43187, 2.69431, 3.42356, 0.720562]
Clostridium leptum	38	1	25015	[150, 2, 106.5, 99.9204, 121, 89]	[0.005996, 8e-05, 0.004257, 0.00399444, 0.004837, 0.003558]	[5.91249, 0.21147, 0.959995, 1.48027, 1.56088, 0.562502]
Clostridium perfringens	11	10	27144	[500, 38, 281, 312.091, 459, 234.5]	[0.01842, 0.0014, 0.010352, 0.0114976, 0.01691, 0.008639]	[3.56189, 0.35412, 0.83339, 1.14694, 1.31093, 0.49814]
Clostridium sp L2 50	97	1	32513	[701, 0, 347, 376.923, 512.5, 251]	[0.021561, 0, 0.010673, 0.011593, 0.015763, 0.00772]	[22.774, 0.33403, 3.87349, 4.68375, 6.62026, 1.73849]
Clostridium symbiosum	17	3	59893	[293, 35, 217, 213.993, 242, 194.75]	[0.004892, 0.000584, 0.003623, 0.00357294, 0.004041, 0.00325175]	[5.51226, 0.30107, 0.98951, 1.60023, 2.38646, 0.63127]
Coprobacillus sp 29 1	30	1	12336	[27, 0, 6, 7.48276, 10, 4]	[0.002189, 0, 0.000486, 0.000606525, 0.000811, 0.000324]	[4.3811, 0.18831, 0.631465, 1.16951, 1.52244, 0.489498]
Coprococcus catus	58	1	66644	[779, 73, 406, 436.199, 479, 367]	[0.011689, 0.001095, 0.006092, 0.00654521, 0.007187, 0.005507]	[2.31064, 0.25936, 0.81079, 0.890921, 1.1589, 0.51208]
Coprococcus comes	374	1	53414	[686, 1, 340, 347.675, 389, 299]	[0.012843, 1.9e-05, 0.006365, 0.00650905, 0.007283, 0.005598]	[9.33264, 0.24065, 1.21764, 1.61721, 1.96549, 0.713697]
Coprococcus eutactus	39	1	14629	[122, 0, 68, 67.8122, 81, 57]	[0.00834, 0, 0.004648, 0.00463549, 0.005537, 0.003896]	[24.1828, 0.44801, 3.09762, 4.7791, 6.98487, 1.49063]
Coprococcus sp ART55 1	231	1	98969	[2441, 2, 615, 753.44, 752.5, 552]	[0.024664, 2e-05, 0.006214, 0.0076129, 0.007603, 0.005578]	[29.3639, 0.19269, 3.48601, 5.26082, 7.01768, 1.64635]
Dialister invisus	228	1	40262	[683, 2, 460, 434.778, 506, 398]	[0.016964, 5e-05, 0.011425, 0.0107987, 0.012568, 0.009885]	[40.4785, 0.24364, 4.79468, 5.66822, 7.57232, 2.1803]
Dorea formicigenerans	200	2	81970	[1221, 9, 695, 703.51, 823, 592]	[0.014896, 0.00011, 0.008479, 0.00858253, 0.01004, 0.007222]	[7.19028, 0.25418, 0.94931, 1.1994, 1.37013, 0.64145]
Dorea longicatena	303	1	64181	[535, 3, 321, 320.817, 352, 290]	[0.008336, 4.7e-05, 0.005001, 0.00499862, 0.005484, 0.004518]	[10.7504, 0.23155, 1.52429, 1.92809, 2.46774, 0.80531]
Enterococcus durans	4	3	17754	[44, 14, 27, 27.3333, 28.5, 24]	[0.002478, 0.000789, 0.001521, 0.0015395, 0.001605, 0.0013515]	[4.18995, 0.2904, 1.36054, 1.80036, 2.53958, 0.621315]
Enterococcus faecalis	13	50	73620	[555, 2, 452, 403.91, 490.75, 403.25]	[0.007539, 2.7e-05, 0.0061395, 0.00548642, 0.00666575, 0.00547725]	[7.26711, 0.48973, 1.38693, 2.30517, 2.82665, 1.18924]
Enterococcus faecium	10	50	87880	[465, 72, 323, 299.578, 372, 268]	[0.005291, 0.000819, 0.003675, 0.00340891, 0.004233, 0.00305]	[8.56403, 0.9975, 2.26435, 3.3629, 3.8095, 1.57788]
Escherichia coli	236	45	8628	[208, 0, 101, 105.817, 143, 71]	[0.024108, 0, 0.011706, 0.0122644, 0.016574, 0.008229]	[98.95, 0.30432, 3.12118, 7.4834, 8.04863, 1.42109]
Eubacterium eligens	401	1	31762	[702, 3, 343, 350.738, 417, 279]	[0.022102, 9.4e-05, 0.010799, 0.0110427, 0.013129, 0.008784]	[23.6274, 0.25619, 2.51904, 3.6728, 4.46411, 1.46187]
Eubacterium hallii	329	1	89542	[1264, 11, 470, 505.095, 554, 421]	[0.014116, 0.000123, 0.005249, 0.00564087, 0.006187, 0.004702]	[16.5073, 0.21856, 1.82509, 2.34799, 3.03131, 1.01501]
Eubacterium ramulus	91	1	70010	[652, 18, 459, 456.242, 495, 422]	[0.009313, 0.000257, 0.006556, 0.00651682, 0.00707, 0.006028]	[7.29834, 0.2189, 1.07037, 1.34072, 1.51919, 0.679595]
Eubacterium rectale	540	3	95927	[2385, 0, 1406, 1426.85, 1606, 1248]	[0.024863, 0, 0.014657, 0.0148744, 0.016742, 0.01301]	[39.11, 0.25455, 5.0666, 7.37883, 10.0318, 2.22776]
Eubacterium siraeum	189	4	104459	[2764, 9, 1937, 1864.28, 2232, 1552]	[0.02646, 8.6e-05, 0.018543, 0.017847, 0.021367, 0.014858]	[28.7093, 0.39749, 3.08635, 5.07478, 6.18987, 1.67972]
Eubacterium sp 3 1 31	11	2	17135	[149, 0, 55, 64.5455, 74, 45.5]	[0.008696, 0, 0.00321, 0.00376696, 0.0043185, 0.0026555]	[1.73831, 0.20894, 0.70825, 0.675358, 0.78265, 0.349695]
Fusobacterium gonidiaformans	5	2	39391	[213, 10, 192, 152.2, 199.5, 93]	[0.005407, 0.000254, 0.0048745, 0.0038639, 0.00506475, 0.002361]	[41.0611, 0.26473, 1.60325, 10.736, 10.3747, 0.37605]
Fusobacterium nucleatum	1	30	26035	[0, 0, 0, 0, 0, 0]	[0, 0, 0, 0, 0, 0]	[1.57331, 1.57331, 1.57331, 1.57331, 1.57331, 1.57331]
Fusobacterium ulcerans	13	1	15785	[171, 1, 125, 115.212, 136.75, 97]	[0.010833, 6.3e-05, 0.007919, 0.00729891, 0.00866325, 0.006145]	[9.82795, 0.18838, 1.18993, 2.00542, 1.63897, 0.61221]
Haemophilus parainfluenzae	45	5	16492	[472, 122, 274, 280.802, 314, 244]	[0.02862, 0.007398, 0.016614, 0.0170266, 0.01904, 0.014795]	[58.4301, 0.6669, 2.44614, 4.64266, 4.81346, 1.74261]
Klebsiella pneumoniae	75	48	30814	[289, 1, 174, 170.239, 192, 152]	[0.009379, 3.2e-05, 0.005647, 0.00552474, 0.006231, 0.004933]	[26.5515, 0.62646, 2.0812, 4.36475, 4.9154, 1.15423]
Lachnospiraceae bacterium 1 1 57FAA	253	1	5372	[34, 0, 10, 10.4713, 14, 7]	[0.006329, 0, 0.001862, 0.00194927, 0.002606, 0.001303]	[52.3883, 0.0265, 0.279755, 1.2619, 0.853565, 0.100002]
Lachnospiraceae bacterium 8 1 57FAA	249	1	2111	[20, 0, 5, 5.29939, 7, 3]	[0.009474, 0, 0.002369, 0.00251039, 0.003316, 0.001421]	[0, 0, 0, 0, 0, 0]
Lactobacillus fermentum	8	7	91048	[1015, 32, 269, 439.75, 543, 212]	[0.011148, 0.000351, 0.0029545, 0.00482982, 0.005964, 0.00232825]	[3.94622, 0.21175, 1.82562, 1.78951, 2.19144, 1.12848]
Lactobacillus johnsonii	4	5	21075	[544, 132, 503.5, 399.5, 534, 253.25]	[0.025813, 0.006263, 0.023891, 0.0189562, 0.025338, 0.0120167]	[13.9202, 1.2357, 2.36809, 4.97303, 5.27041, 2.07071]
Lactobacillus reuteri	3	12	38819	[1066, 107, 1063, 745.333, 1064.5, 585]	[0.027461, 0.002756, 0.027383, 0.0192, 0.027422, 0.0150695]	[17.9757, 1.68692, 2.36195, 7.34153, 10.1688, 2.02443]
Lactobacillus ruminis	33	4	39376	[550, 0, 380.5, 354.387, 456, 247]	[0.013968, 0, 0.0096635, 0.00900007, 0.011581, 0.006273]	[6.4042, 0.5016, 1.58026, 1.89661, 2.02129, 0.88945]
Lactobacillus salivarius	27	7	39778	[523, 3, 361, 304.459, 423.5, 267.5]	[0.013148, 7.5e-05, 0.009075, 0.00765393, 0.0106465, 0.0067245]	[19.6237, 0.38167, 1.57154, 2.71414, 2.77474, 1.03841]
Lactococcus lactis	16	28	20863	[112, 1, 28.5, 35.8083, 45.25, 18]	[0.005368, 4.8e-05, 0.001366, 0.0017163, 0.002169, 0.000863]	[5.70865, 0.26617, 1.31681, 1.96979, 2.28578, 0.886373]
Megasphaera micronuciformis	16	1	13781	[240, 95, 162, 160.933, 182.5, 141.5]	[0.017415, 0.006894, 0.011755, 0.0116779, 0.0132433, 0.0102678]	[2.20157, 0.16069, 0.754705, 0.969788, 1.3506, 0.647718]
Methanobrevibacter smithii	54	23	20798	[399, 0, 113, 201.742, 338, 77]	[0.019185, 0, 0.005433, 0.00970007, 0.016252, 0.003702]	[34.3611, 0.44951, 5.1482, 6.64172, 9.47098, 2.73645]
Odoribacter laneus	15	1	89693	[724, 2, 608, 466.945, 636.5, 304.5]	[0.008072, 2.2e-05, 0.006779, 0.00520602, 0.0070965, 0.003395]	[10.7188, 1.19286, 2.093, 3.36984, 4.17045, 1.67978]
Odoribacter splanchnicus	384	1	103904	[1217, 1, 370, 388.01, 474, 299]	[0.011713, 1e-05, 0.003561, 0.00373431, 0.004562, 0.002878]	[6.79843, 0.18583, 1.03985, 1.34609, 1.68435, 0.686643]
Parabacteroides distasonis	156	1	47421	[263, 0, 122, 110.454, 150, 78]	[0.005546, 0, 0.002573, 0.00232923, 0.003163, 0.001645]	[31.4827, 0.05046, 1.77344, 3.28874, 3.40209, 0.956292]
Parabacteroides goldsteinii	29	2	47558	[438, 9, 299, 293.585, 335.75, 263.25]	[0.00921, 0.000189, 0.006287, 0.00617319, 0.00705975, 0.00553525]	[8.48446, 0.24911, 1.40965, 1.73854, 2.09754, 0.66544]
Parabacteroides johnsonii	51	1	80700	[540, 3, 402, 355.693, 432, 361]	[0.006691, 3.7e-05, 0.004981, 0.00440761, 0.005353, 0.004473]	[7.94529, 0.27907, 1.73566, 2.20051, 2.77678, 1.02199]
Parabacteroides merdae	434	2	80309	[675, 0, 351, 342.464, 399.25, 296]	[0.008405, 0, 0.004371, 0.00426433, 0.00497125, 0.003686]	[33.2387, 0.29699, 2.17543, 3.46078, 4.05504, 1.24005]
Parabacteroides sp ASF519	22	1	1396	[19, 0, 9, 8.54545, 11, 6]	[0.01361, 0, 0.006447, 0.00612139, 0.00788, 0.004298]	[0, 0, 0, 0, 0, 0]
Parabacteroides sp D13	19	1	36437	[22, 0, 7, 7.52941, 11, 3]	[0.000604, 0, 0.000192, 0.00020661, 0.000302, 8.2e-05]	[15.1159, 0.53693, 1.09623, 2.41377, 1.71585, 0.632257]
Peptostreptococcus anaerobius	5	2	22595	[97, 26, 79.5, 73.5, 85.5, 73.5]	[0.004293, 0.001151, 0.0035185, 0.003253, 0.00378375, 0.00325325]	[4.28895, 0.24572, 3.83757, 3.03281, 3.9411, 2.85072]
Peptostreptococcus stomatis	9	1	19113	[217, 148, 188, 187.889, 198.75, 178.75]	[0.011354, 0.007743, 0.009836, 0.00983031, 0.0103982, 0.009352]	[6.85536, 0.40735, 1.04231, 1.75992, 1.65421, 0.60097]
Prevotella buccae	14	2	31636	[292, 193, 254, 250.56, 269.5, 237.5]	[0.00923, 0.006101, 0.008029, 0.00792012, 0.008519, 0.007507]	[31.4651, 0.18377, 0.62303, 3.53943, 2.54123, 0.283768]
Prevotella copri	323	1	64734	[3314, 10, 1579, 1557.7, 1789, 1344]	[0.051194, 0.000154, 0.024392, 0.0240631, 0.027636, 0.020762]	[83.194, 0.1615, 14.8031, 21.3627, 35.5133, 3.65101]
Prevotella denticola	5	5	45413	[578, 496, 546.5, 543.9, 564.25, 529.75]	[0.012728, 0.010922, 0.012034, 0.0119767, 0.0124245, 0.0116655]	[1.93348, 0.29474, 0.47427, 0.895234, 1.3428, 0.43088]
Prevotella stercorea	59	1	36384	[950, 7, 781, 770.906, 824, 732]	[0.02611, 0.000192, 0.021465, 0.0211881, 0.022647, 0.020119]	[62.7381, 0.33239, 5.97458, 11.8087, 17.7217, 3.1803]
Roseburia hominis	178	1	66155	[1002, 24, 503, 519.733, 574, 446]	[0.015146, 0.000363, 0.007603, 0.00785629, 0.008677, 0.006742]	[10.9808, 0.18146, 1.1784, 1.63626, 2.0377, 0.685285]
Roseburia intestinalis	335	3	94836	[646, 4, 423, 421.973, 458, 387]	[0.006812, 4.2e-05, 0.00446, 0.00444949, 0.004829, 0.004081]	[31.6258, 0.23939, 1.9992, 2.97283, 3.80051, 1.08352]
Roseburia inulinivorans	532	1	69188	[2171, 0, 1025, 1056.25, 1157, 919]	[0.031378, 0, 0.014815, 0.0152663, 0.016723, 0.013283]	[20.8197, 0.18093, 1.56743, 2.39132, 2.79817, 0.853992]
Ruminococcaceae bacterium D16	19	1	6364	[122, 3, 85, 76.8889, 93.5, 66.5]	[0.01917, 0.000471, 0.013356, 0.0120819, 0.014692, 0.0104495]	[3.20096, 0.3303, 0.75059, 1.02402, 1.23929, 0.59169]
Ruminococcus bromii	527	1	92794	[1795, 2, 1311, 1304.77, 1436, 1187]	[0.019344, 2.2e-05, 0.014128, 0.014061, 0.015475, 0.012792]	[61.9218, 0.26672, 4.60002, 6.79393, 9.02781, 2.23762]
Ruminococcus callidus	73	1	44895	[714, 6, 404, 422.29, 485, 353]	[0.015904, 0.000134, 0.008999, 0.00940618, 0.010803, 0.007863]	[6.45116, 0.21888, 1.09571, 1.39515, 1.7279, 0.72984]
Ruminococcus champanellensis	19	1	31573	[433, 13, 283, 268.626, 337, 223]	[0.013714, 0.000412, 0.008963, 0.00850805, 0.0106735, 0.007063]	[16.0147, 0.41875, 1.0248, 2.30699, 2.54, 0.637005]
Ruminococcus gnavus	159	3	87955	[1195, 9, 502, 552.134, 783, 313]	[0.013586, 0.000102, 0.005707, 0.00627745, 0.008902, 0.003559]	[20.3413, 0.21776, 1.58598, 2.85617, 3.56713, 0.753405]
Ruminococcus lactaris	235	2	111732	[730, 26, 411, 419.471, 467, 367]	[0.006533, 0.000233, 0.003678, 0.00375424, 0.00418, 0.003285]	[8.47624, 0.28494, 1.39568, 1.76071, 2.09349, 0.935645]
Ruminococcus obeum	148	2	31034	[316, 63, 174, 175.771, 195, 155]	[0.010182, 0.00203, 0.005607, 0.00566383, 0.006283, 0.004995]	[16.022, 0.30016, 1.66156, 1.92936, 2.32835, 0.98948]
Ruminococcus sp 5 1 39BFAA	568	1	59535	[764, 6, 401, 406.043, 450, 355]	[0.012833, 0.000101, 0.006736, 0.00682024, 0.007559, 0.005963]	[33.9024, 0.13542, 1.59464, 2.56573, 2.98992, 0.805658]
Ruminococcus torques	335	2	1791	[22, 0, 1, 1.971, 2, 0]	[0.012284, 0, 0.000558, 0.00110042, 0.001117, 0]	[24.4673, 0.28414, 2.45183, 3.53375, 4.0274, 1.52494]
Streptococcus anginosus	11	12	45165	[827, 261, 588, 585.127, 677.5, 506]	[0.018311, 0.005779, 0.013019, 0.0129553, 0.0150005, 0.0112035]	[2.58426, 0.62457, 0.9725, 1.18864, 1.29596, 0.78823]
Streptococcus mutans	3	50	72890	[434, 50, 400, 294.667, 417, 225]	[0.005954, 0.000686, 0.005488, 0.00404267, 0.005721, 0.003087]	[1.62882, 0.23071, 0.78868, 0.882737, 1.20875, 0.509695]
Streptococcus parasanguinis	50	9	27093	[621, 232, 396, 398.273, 438, 353]	[0.022921, 0.008563, 0.014616, 0.0147002, 0.016167, 0.013029]	[9.06174, 0.45769, 1.94658, 2.30006, 2.58662, 1.26225]
Streptococcus salivarius	89	9	40379	[823, 71, 524, 528.185, 589, 464]	[0.020382, 0.001758, 0.012977, 0.0130807, 0.014587, 0.011491]	[24.0009, 0.14642, 2.03924, 3.7349, 4.01172, 1.10279]
Streptococcus sanguinis	2	22	26937	[747, 747, 747, 747, 747, 747]	[0.027731, 0.027731, 0.027731, 0.027731, 0.027731, 0.027731]	[5.11817, 1.35963, 3.2389, 3.2389, 4.17854, 2.29927]
Streptococcus thermophilus	64	14	26884	[169, 0, 87, 83.0287, 110, 62]	[0.006286, 0, 0.003236, 0.00308841, 0.004092, 0.002306]	[12.5111, 0.36621, 1.47934, 2.07393, 2.71624, 1.07239]
Streptococcus vestibularis	20	1	3092	[49, 3, 28, 26.3737, 35, 18]	[0.015847, 0.00097, 0.009056, 0.00852962, 0.01132, 0.005821]	[11.6832, 0.32244, 1.81888, 2.79674, 2.84356, 1.45122]
Sutterella parvirubra	7	1	28217	[179, 59, 142, 136.19, 162, 114]	[0.006344, 0.002091, 0.005032, 0.00482652, 0.005741, 0.00404]	[6.60275, 0.07459, 1.9385, 2.44493, 2.69353, 1.5558]
Sutterella wadsworthensis	96	2	99553	[2282, 10, 1086, 1021.46, 1308, 699]	[0.022922, 0.0001, 0.010909, 0.0102605, 0.013139, 0.007021]	[13.4099, 0.35242, 1.82039, 2.40598, 2.75944, 1.07629]
Treponema succinifaciens	19	1	38961	[294, 0, 219, 214.678, 240, 202]	[0.007546, 0, 0.005621, 0.00551004, 0.00616, 0.005185]	[79.4396, 1.35728, 7.64534, 14.6217, 14.2064, 4.3359]
Veillonella atypica	42	2	35100	[627, 227, 379.5, 384.97, 419, 343]	[0.017863, 0.006467, 0.010812, 0.0109678, 0.011937, 0.009772]	[4.16158, 0.03622, 0.334325, 0.56448, 0.590083, 0.17038]
Veillonella parvula	71	4	27401	[613, 107, 364, 372.552, 417, 323]	[0.022371, 0.003905, 0.013284, 0.0135963, 0.015218, 0.011788]	[9.54715, 0.00863, 1.11092, 1.69243, 2.06554, 0.47296]
