# Supplementary material for: Microbial strain-level population structure and genetic diversity from metagenomes
Source: Genome Res. 2017 Apr;27(4):626–38. doi: 10.1101/gr.216242.116 (PMC5378180; doi:10.1101/gr.216242.116)
Supplement: Supplemental Material [file supp_gr.216242.116_Supplemental_Table_S9.xlsx]

## Sheet: Supplemental Table S9
Species	Relative abundance of dominant strains (%)
Akkermansia muciniphila	93.15
Alloscardovia omnicolens	100
Bacteroidales bacterium ph8	83.13
Barnesiella intestinihominis	90.57
Catenibacterium mitsuokai	73.37
Faecalibacterium prausnitzii	78.05
Finegoldia magna	100
Methanosphaera stadtmanae	100
Phascolarctobacterium succinatutens	78.83
Acidaminococcus fermentans	73.66
Acidaminococcus sp D21	84.91
Alistipes indistinctus	82.28
Alistipes onderdonkii	86.84
Alistipes putredinis	90.56
Alistipes shahii	84.66
Alistipes sp HGB5	82.2
Bacteroides caccae	91.85
Bacteroides cellulosilyticus	89.59
Bacteroides coprocola	93.09
Bacteroides coprophilus	91.82
Bacteroides dorei	92.85
Bacteroides eggerthii	93.09
Bacteroides faecis	78.83
Bacteroides finegoldii	91.38
Bacteroides fragilis	93.07
Bacteroides intestinalis	92.3
Bacteroides massiliensis	91.95
Bacteroides ovatus	87.87
Bacteroides pectinophilus	92.08
Bacteroides salyersiae	84.72
Bacteroides sp 1 1 6	84.18
Bacteroides sp 3 1 19	85.76
Bacteroides stercoris	90.88
Bacteroides thetaiotaomicron	88.66
Bacteroides uniformis	86.73
Bacteroides vulgatus	91.04
Bifidobacterium adolescentis	79.28
Bifidobacterium animalis	91.96
Bifidobacterium bifidum	91
Bifidobacterium breve	74.07
Bifidobacterium dentium	84.3
Bifidobacterium longum	83.42
Bifidobacterium pseudocatenulatum	89.96
Blautia hydrogenotrophica	86.83
Butyrivibrio crossotus	90.82
Citrobacter freundii	90.89
Clostridium bolteae	85.67
Clostridium clostridioforme	79.07
Clostridium hathewayi	89.12
Clostridium leptum	82.25
Clostridium perfringens	89.52
Clostridium sp L2 5100	91.59
Clostridium symbiosum	79.07
Coprobacillus sp 29 1	79.41
Coprococcus catus	84.18
Coprococcus comes	81.09
Coprococcus eutactus	92.25
Coprococcus sp ART55 1	90.21
Dialister invisus	82.04
Dorea formicigenerans	77.73
Dorea longicatena	78.93
Enterobacter cloacae	100
Enterococcus durans	100
Enterococcus faecalis	79.98
Enterococcus faecium	89.64
Escherichia coli	85.47
Eubacterium eligens	89.91
Eubacterium hallii	81.05
Eubacterium ramulus	90.99
Eubacterium rectale	81.38
Eubacterium siraeum	88.41
Eubacterium sp 3 1 31	91.9
Fusobacterium gonidiaformans	100
Fusobacterium nucleatum	87.74
Fusobacterium ulcerans	87.86
Haemophilus parainfluenzae	81.92
Klebsiella pneumoniae	89.65
Lachnospiraceae bacterium 1 1 57FAA	80.73
Lachnospiraceae bacterium 8 1 57FAA	80.63
Lactobacillus fermentum	89.29
Lactobacillus johnsonii	90.17
Lactobacillus reuteri	75.87
Lactobacillus ruminis	79.42
Lactobacillus salivarius	91.22
Lactococcus lactis	77.43
Megasphaera micronuciformis	83.1
Methanobrevibacter smithii	80.8
Odoribacter laneus	84.96
Odoribacter splanchnicus	89.3
Parabacteroides distasonis	89.62
Parabacteroides goldsteinii	76.34
Parabacteroides johnsonii	82.8
Parabacteroides merdae	88.98
Parabacteroides sp ASF519	100
Parabacteroides sp D13	92.48
Peptostreptococcus anaerobius	82.99
Peptostreptococcus stomatis	91.26
Prevotella buccae	90.59
Prevotella copri	85.57
Prevotella denticola	85.6
Prevotella stercorea	91.14
Roseburia hominis	89.92
Roseburia intestinalis	90.59
Roseburia inulinivorans	85.84
Ruminococcaceae bacterium D16	89.04
Ruminococcus bromii	86.61
Ruminococcus callidus	84.44
Ruminococcus champanellensis	83.69
Ruminococcus gnavus	88.87
Ruminococcus lactaris	82.12
Ruminococcus obeum	79.89
Ruminococcus sp 5 1 39BFAA	78.49
Ruminococcus torques	81.96
Streptococcus anginosus	74.35
Streptococcus mutans	100
Streptococcus parasanguinis	80.55
Streptococcus salivarius	81.32
Streptococcus sanguinis	71.26
Streptococcus thermophilus	76.44
Streptococcus vestibularis	85.47
Sutterella parvirubra	87.51
Sutterella wadsworthensis	89
Treponema succinifaciens	87.88
Veillonella atypica	84.95
Veillonella parvula	82.45
